# Supplementary material for: Rate coefficients for the reaction of O( 1 D) with the atmospherically long-lived greenhouse gases NF 3 , SF 5 CF 3 , CHF 3 , C 2 F 6 , c-C 4 F 8 , n -C 5 F 12 , and n -C 6 F 14
Source: Copernicus journal article supplement (doi:10.5194/acp-12-11753-2012), 2012-12-11
Supplement: Supplementary file 1 [file acp-12-11753-2012-supplement.pdf]

# Rate coefficients for the reaction of O(<sup>1</sup>D) with the atmospherically long-lived greenhouse gases NF<sub>3</sub>, SF<sub>5</sub>CF<sub>3</sub>, CHF<sub>3</sub>, C<sub>2</sub>F<sub>6</sub>, c-C<sub>4</sub>F<sub>8</sub>, n-C<sub>5</sub>F<sub>12</sub>, and n-C<sub>6</sub>F<sub>14</sub>

M. Baasandorj,<sup>1,2,#</sup> B. D. Hall,<sup>3</sup> and J. B. Burkholder<sup>1\*</sup>

<sup>1</sup> Earth System Research Laboratory, Chemical Sciences Division, National Oceanic and Atmospheric Administration, 325 Broadway, Boulder, CO 80305, USA

<sup>2</sup> Cooperative Institute for Research in Environmental Sciences, University of Colorado, Boulder, CO 80309 USA

<sup>3</sup> Earth System Research Laboratory, Global Monitoring Division, National Oceanic and Atmospheric Administration, 325 Broadway, Boulder, CO 80305, USA

Atmos. Chem. Phys.

## Supplementary Material

# Current address: Department of Soil, Water, and Climate, University of Minnesota, St. Paul, MN, 55108-6028.

\* Corresponding author: James B. Burkholder e-mail: [James.B.Burkholder@noaa.gov](mailto:James.B.Burkholder@noaa.gov)

**Table S1.** Infrared regions used in the data analysis of the O(<sup>1</sup>D) + Compound reactive rate coefficient relative rate experiments and for quantifying the NF<sub>3</sub> and SF<sub>5</sub>CF<sub>3</sub> concentrations in the competitive rate pulsed laser photolysis-laser induced fluorescence experiments

| Compound                                 | Integration Range (cm <sup>-1</sup> ) |
|------------------------------------------|---------------------------------------|
| NF <sub>3</sub>                          | 840–960                               |
| CF <sub>3</sub> Cl                       | 1070–1150, 1180–1220                  |
| N <sub>2</sub> O                         | 2100–2270, 3400–3500                  |
| CFC–114                                  | 800–860, 1090–1220                    |
| CFC–114a                                 | 1070–1340                             |
| CHF <sub>3</sub>                         | 1100–1200                             |
| SF <sub>5</sub> CF <sub>3</sub>          | 840–930, 1220–1280                    |
| C <sub>2</sub> F <sub>6</sub>            | 1090–1130, 1200–1280                  |
| <i>c</i> -C <sub>4</sub> F <sub>8</sub>  | 930–990, 1270–1360                    |
| <i>n</i> -C <sub>5</sub> F <sub>12</sub> | 1180–1420                             |
| <i>n</i> -C <sub>6</sub> F <sub>14</sub> | 1084–1370                             |

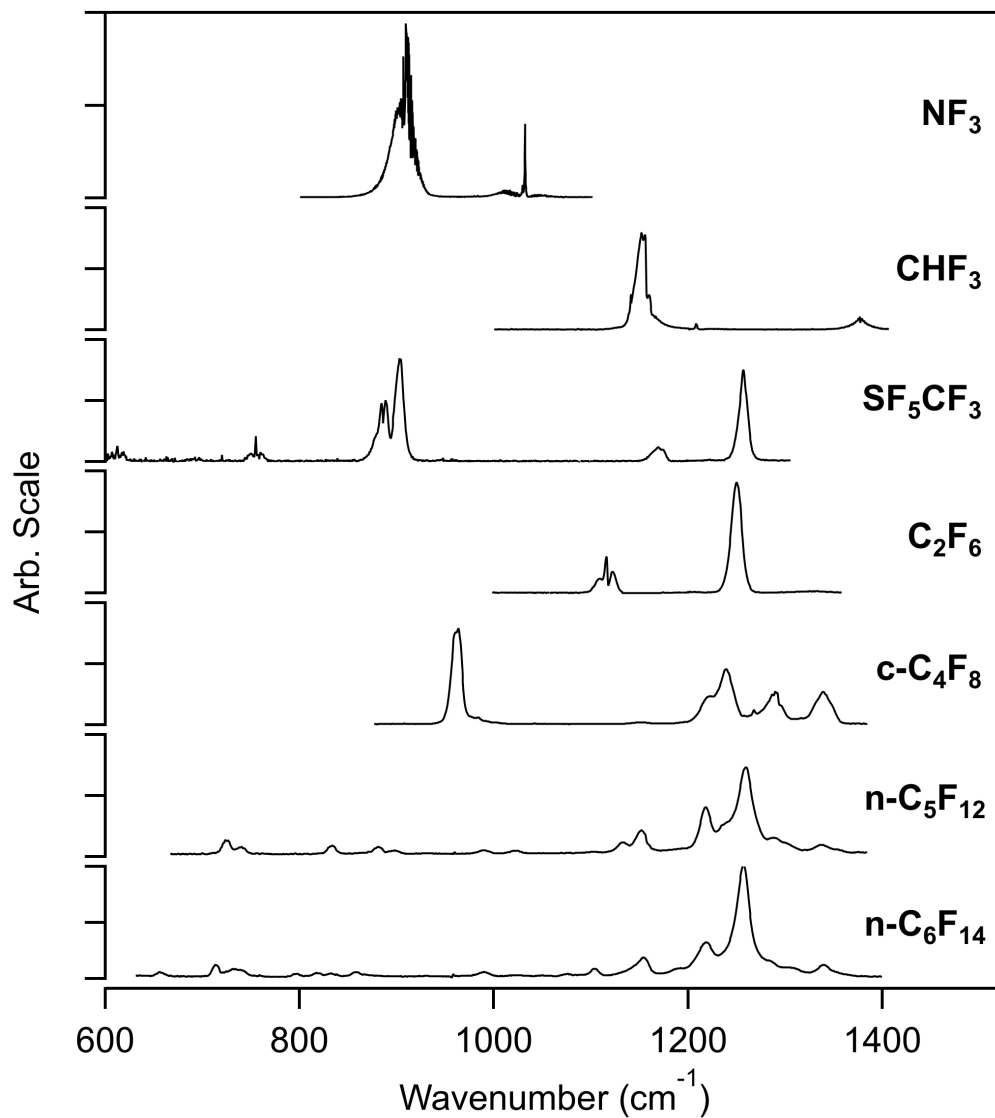

**Fig. S1.** Infrared absorption spectra measured using Fourier transform spectroscopy at 296 K with a resolution of 0.5 or 1  $\text{cm}^{-1}$ . The total pressure was 180 to 600 Torr with a He bath gas (see text).

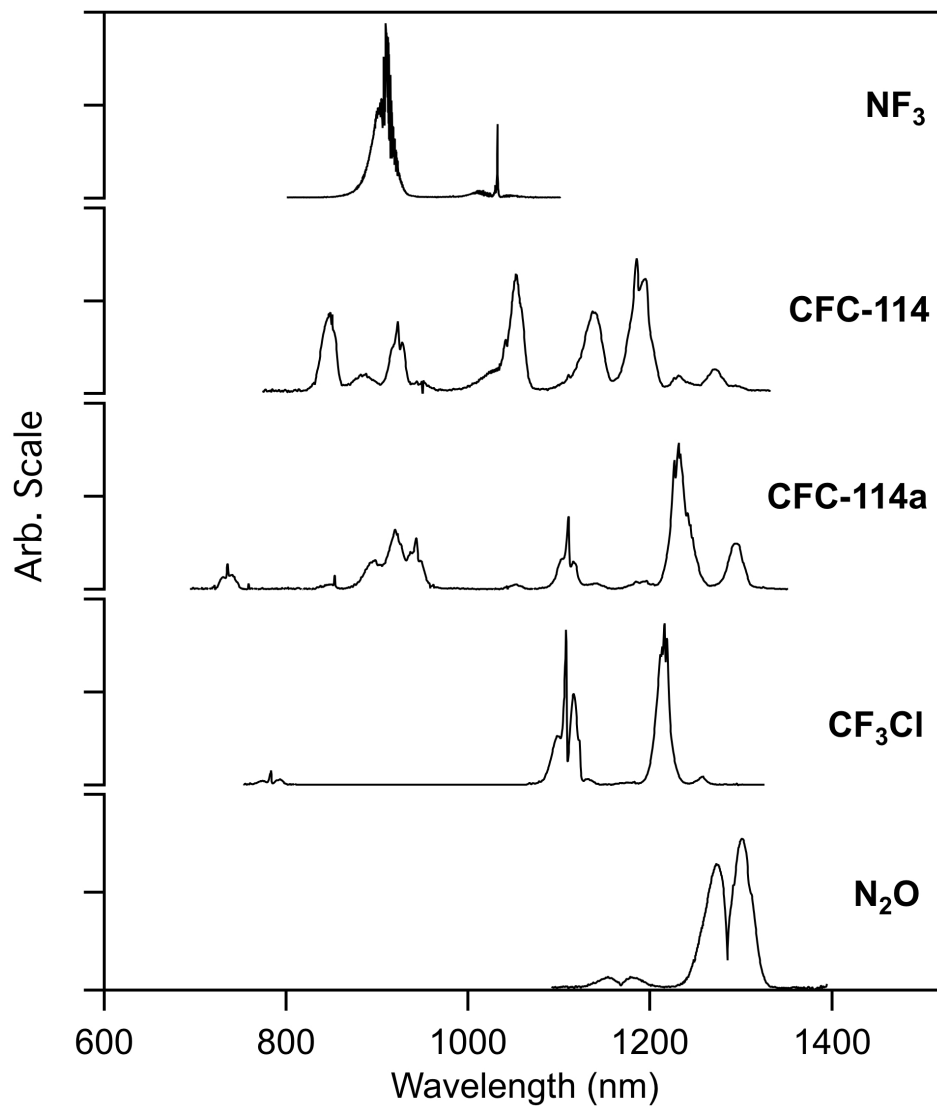

**Fig. S2.** Infrared absorption spectra measured using Fourier transform spectroscopy at 296 K with a resolution of 0.5 or 1  $\text{cm}^{-1}$ . The total pressure was 180 to 600 Torr with a He bath gas (see text).

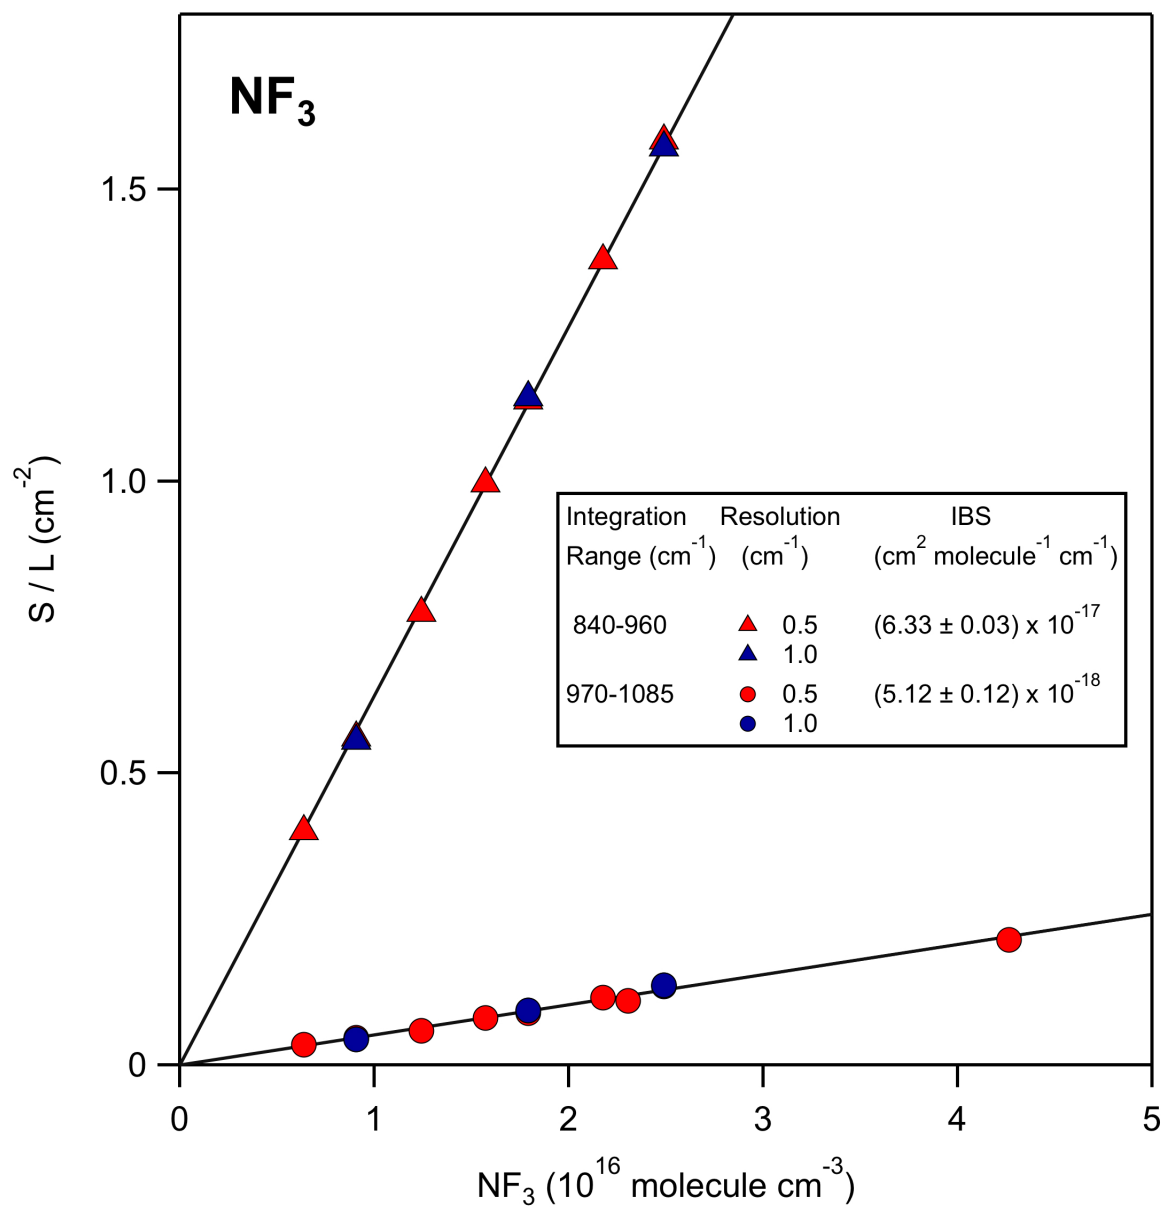

**Fig. S3.** Integrated band strength determination at 298 K for NF<sub>3</sub>

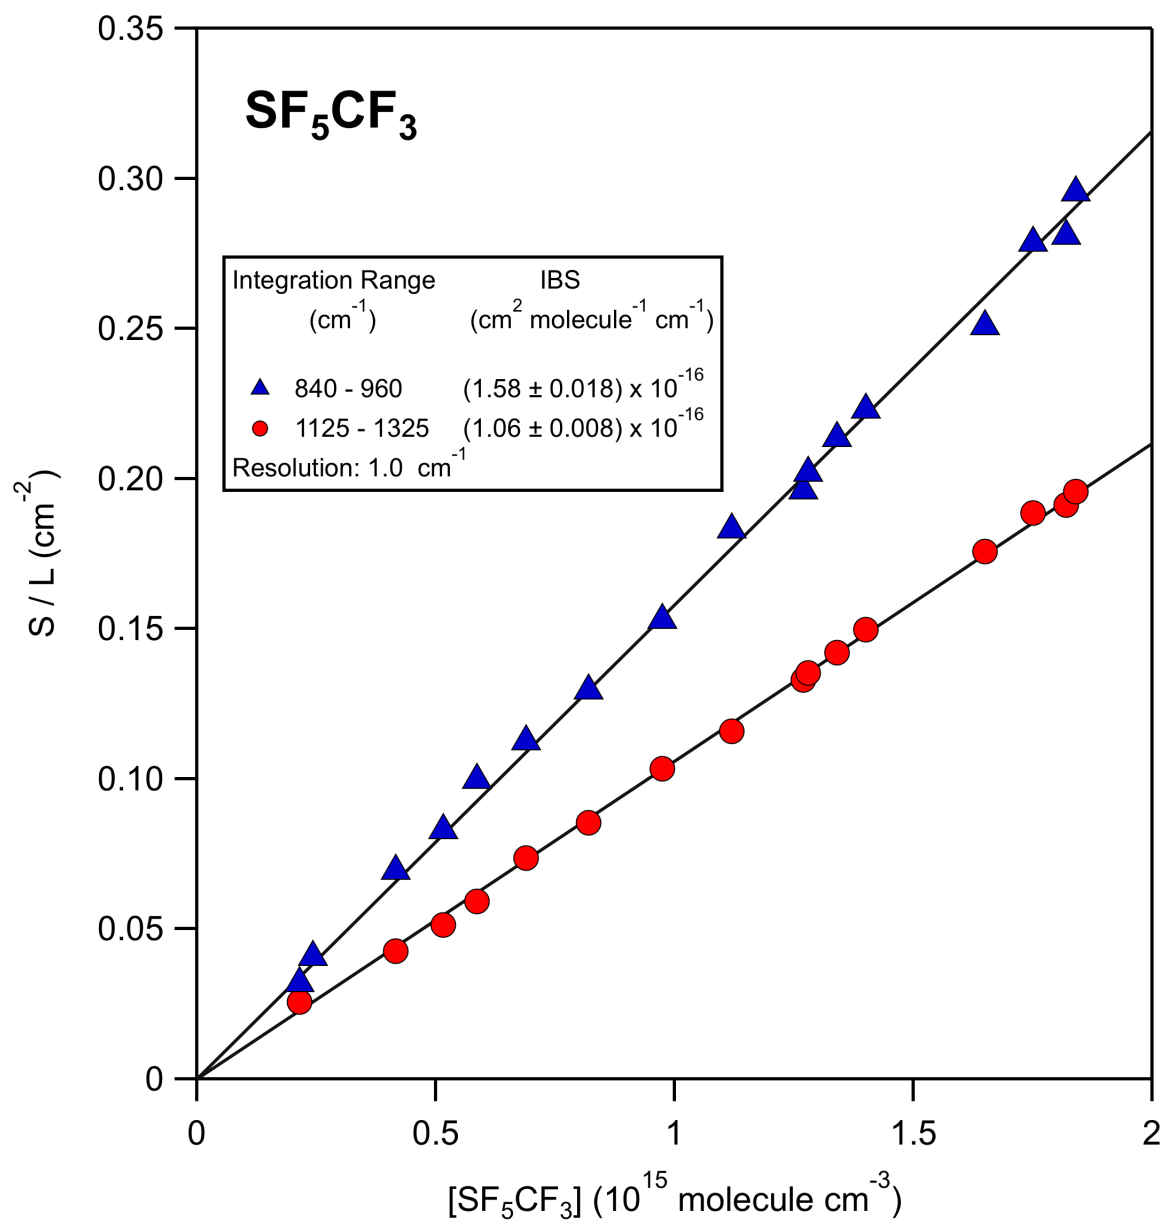

**Fig. S4.** Integrated band strength determination at 298 K for SF<sub>5</sub>CF<sub>3</sub>
